# Supplementary material for: A Hot-spot of In-frame Duplications Activates the Oncoprotein AKT1 in Juvenile Granulosa Cell Tumors
Source: PubMed Central journal article supplement (PMC4485906; doi:10.1016/j.ebiom.2015.03.002), 2015-03-06
Supplement: mmc1.pdf [file mmc1.pdf]

## **Supplementary Results**

The figures below display the electropherograms of the duplications, pair-wise alignments of the wild-type and mutated AKT1 sequences and official mutation names.

### Tumor 1

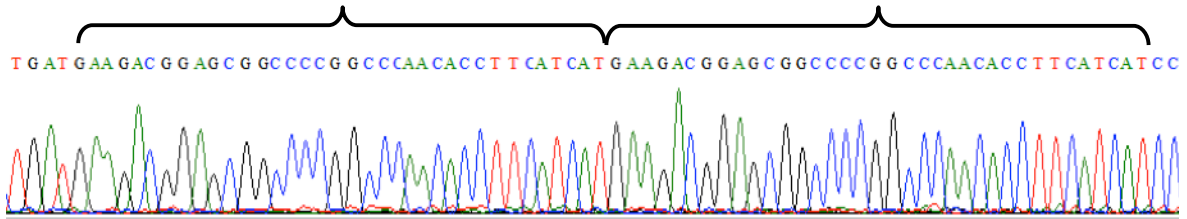

WT                    RPQDVDQREAPLNNFSVAQCQLMKTERPRPNTFI-----IRCLQWTTVIERTF 48  
T1                    RPQDVDQREAPLNNFSVAQCQLMKTERPRPNTFI**IMKTERPRPNTFI**IRCLQWTTVIERTF 60  
                         \*\*\*\*\*  
                         \*\*\*\*\*

Official Mutation name. [NM\\_001014431\(AKT1\\_v001\):c.189\\_224dup](#), p.(Met63\_Ile74dup)

### Tumor 3

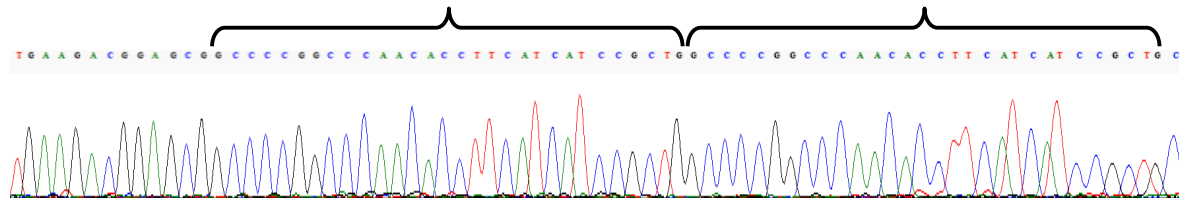

WT                    RPQDVDQREAPLNNFSVAQCQLMKTERPRPNTFIIR-----CLQWTTVIERTFHV  
T3                    RPQDVDQREAPLNNFSVAQCQLMKTERPRPNTFIIR**WRPNTFIIR**CLQWTTVIERTFHV  
                         \*\*\*\*\*  
                         \*\*\*\*\*

Official Mutation name. [NM\\_001014431\(AKT1\\_v001\):c.201\\_230dup](#),  
p.(Arg76\_Cys77insTrpProArgProAsnThrPheIleIleArg)

### Tumor 5

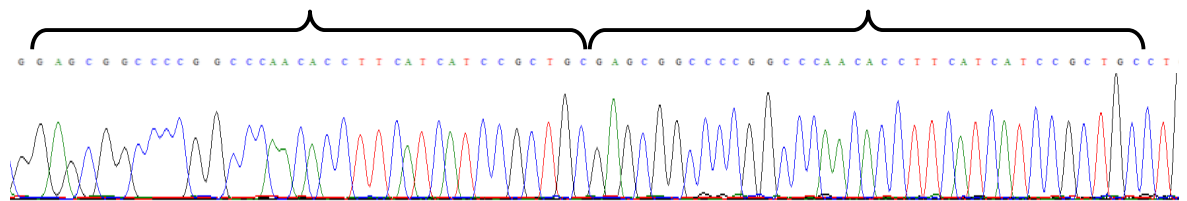

WT                    RPQDVDQREAPLNNFSVAQCQLMKTERPRPNTFIIRC-----LQWTTVIERTF 48  
T5                    RPQDVDQREAPLNNFSVAQCQLMKTERPRPNTFIIR**CERPRPNTFIIR**CLQWTTVIERTF 60  
                         \*\*\*\*\*  
                         \*\*\*\*\*

Official Mutation name. [NM\\_001014431\(AKT1\\_v001\):c.196\\_231dup](#), p.(Glu66\_Cys77dup)

### Tumor 8

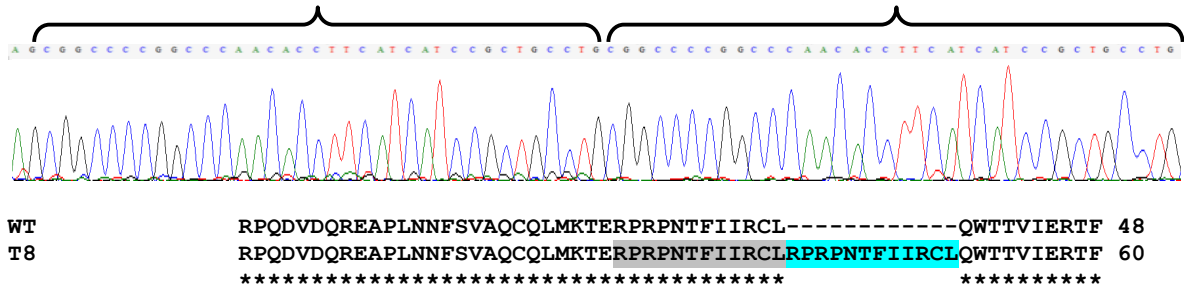

Official Mutation name. [\\_NM\\_001014431\(AKT1\\_v001\):c.200\\_235dup](#), p.(Arg67\_Leu78dup)

### Tumor 11

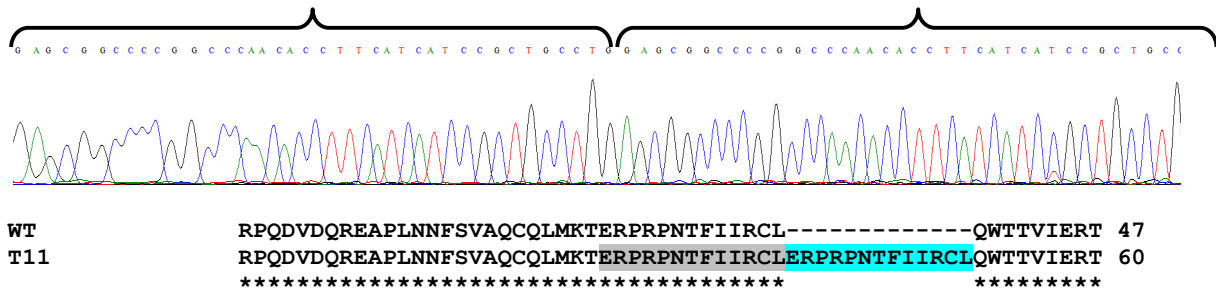

Official Mutation name. [NM\\_001014431\(AKT1\\_v001\):c.196\\_234dup](#), p.(Glu66\_Leu78dup)

### Tumor 12

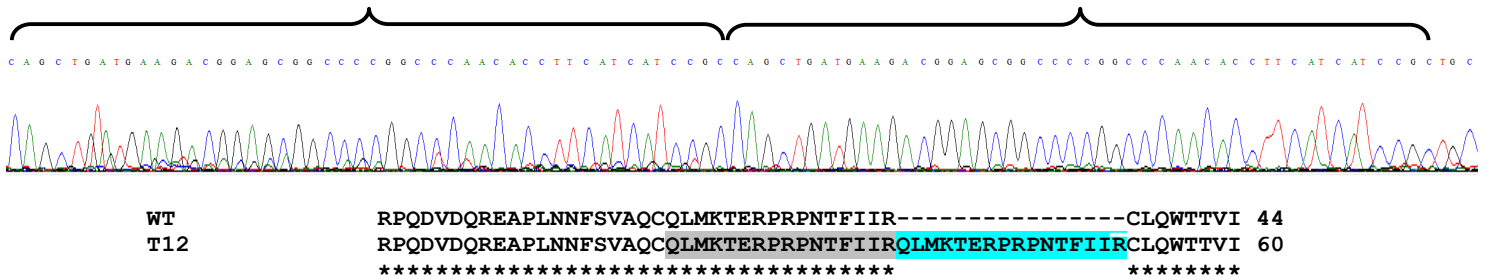

Official Mutation name. [NM\\_001014431\(AKT1\\_v001\):c.181\\_228dup](#), p.(Gln61\_Arg76dup)

### Tumor 13

```

WT          RPQDVDQREAPLNNFSVAQCQLMKTERPRPNTFIIIR-----CLQWTTVI 44
T13        RPQDVDQREAPLNNFSVAQCQLMKTERPRPNTFIIIRQLMKTERPRPNTFIIIRCLQWTTVI 60
          *****
  
```

Official Mutation name. [NM\\_001014431\(AKT1\\_v001\):c.181\\_228dup, p.\(Gln61\\_Arg76dup\)](#)

### Tumor 14

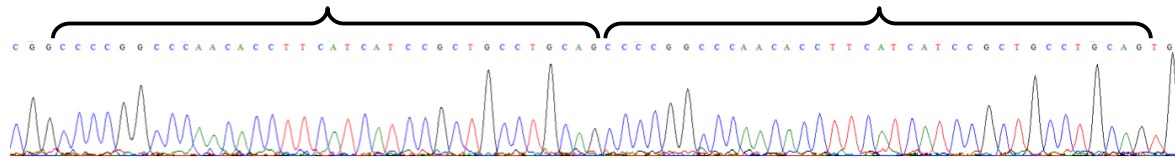

```

WT          RPQDVDQREAPLNNFSVAQCQLMKTERPRPNTFIIIRCLQ-----WTTVIERTF 48
T14        RPQDVDQREAPLNNFSVAQCQLMKTERPRPNTFIIIRCLQPRPNTFIIIRCLQWTTVIERTF 60
          *****
  
```

Official Mutation name. [NM\\_001014431\(AKT1\\_v001\):c.202\\_237dup, p.\(Pro68\\_Gln79dup\)](#)

### Tumor 15

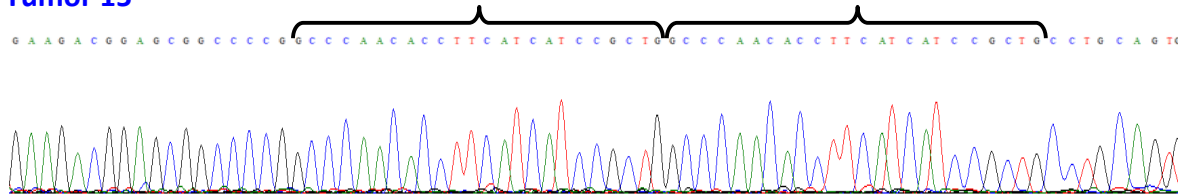

Alignment of the AKT1 wild-type and mutated sequences.

```

WT          RPQDVDQREAPLNNFSVAQCQLMKTERPRPNTFIIIR-----CLQWTTVIERTFFHVET 52
T15        RPQDVDQREAPLNNFSVAQCQLMKTERPRPNTFIIIRWPNTFIIIRCLQWTTVIERTFFHVET 60
          *****
  
```

Official Mutation name. [NM\\_001014431\(AKT1\\_v001\):c.207\\_230dup, p.\(Arg76\\_Cys77insTrpProAsnThrPhellelleArg\)](#)

### Tumor 16

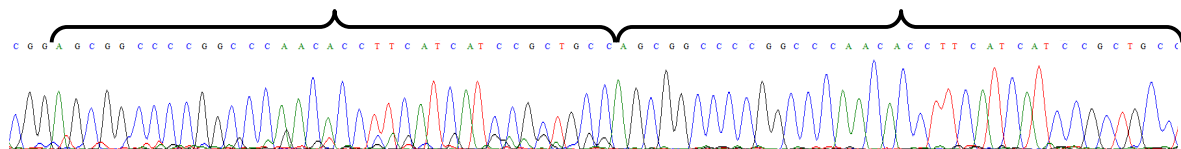

Alignment of the AKT1 wild-type and mutated sequences.

```

WT          RPQDVDQREAPLNNFSVAQCQLMKTERPRPNTFIIIRC-----LQWTTVIERTF 48
T16        RPQDVDQREAPLNNFSVAQCQLMKTERPRPNTFIIIRCORRPNTFIIIRCLQWTTVIERTF 60
          *****
  
```

Official Mutation name. [NM\\_001014431\(AKT1\\_v001\):c.197\\_232dup, p.\(Cys77\\_Leu78insGlnArgProArgProAsnThrPhellelleArgCys\)](#)



The figures below display fluorescence microscopy images of HeLa cells transfected with constructs driving the expression of different AKT1 variants fused to the mCherry fluorescent protein, in the presence of serum. Images were obtained with a Zeiss ApoTome microscope. Scale bars in the figures stand for 20  $\mu\text{m}$ .

**Tumor 3. Mutation p.(Arg76\_Cys77insTrpProArgProAsnThrPhellelleArg)**

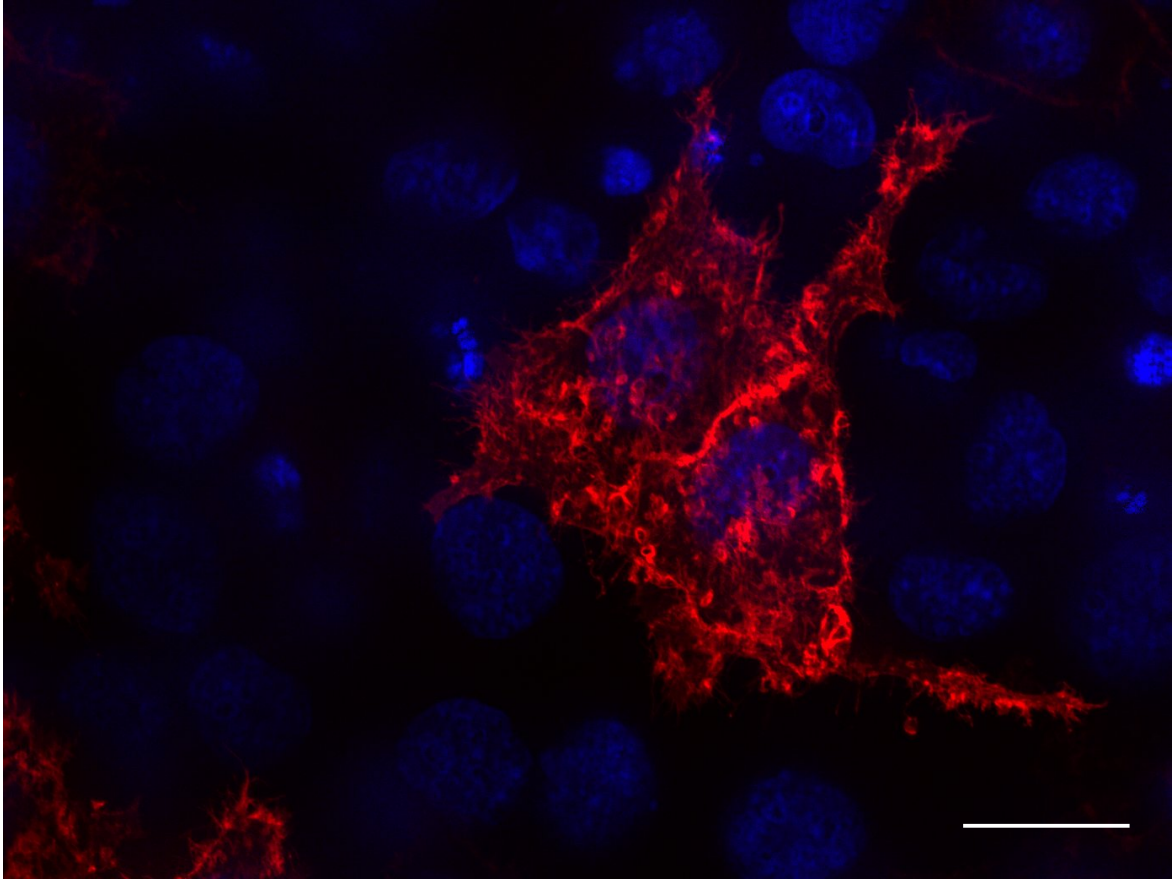

**Tumor 5. Mutation p.(Glu66\_Cys77dup)**

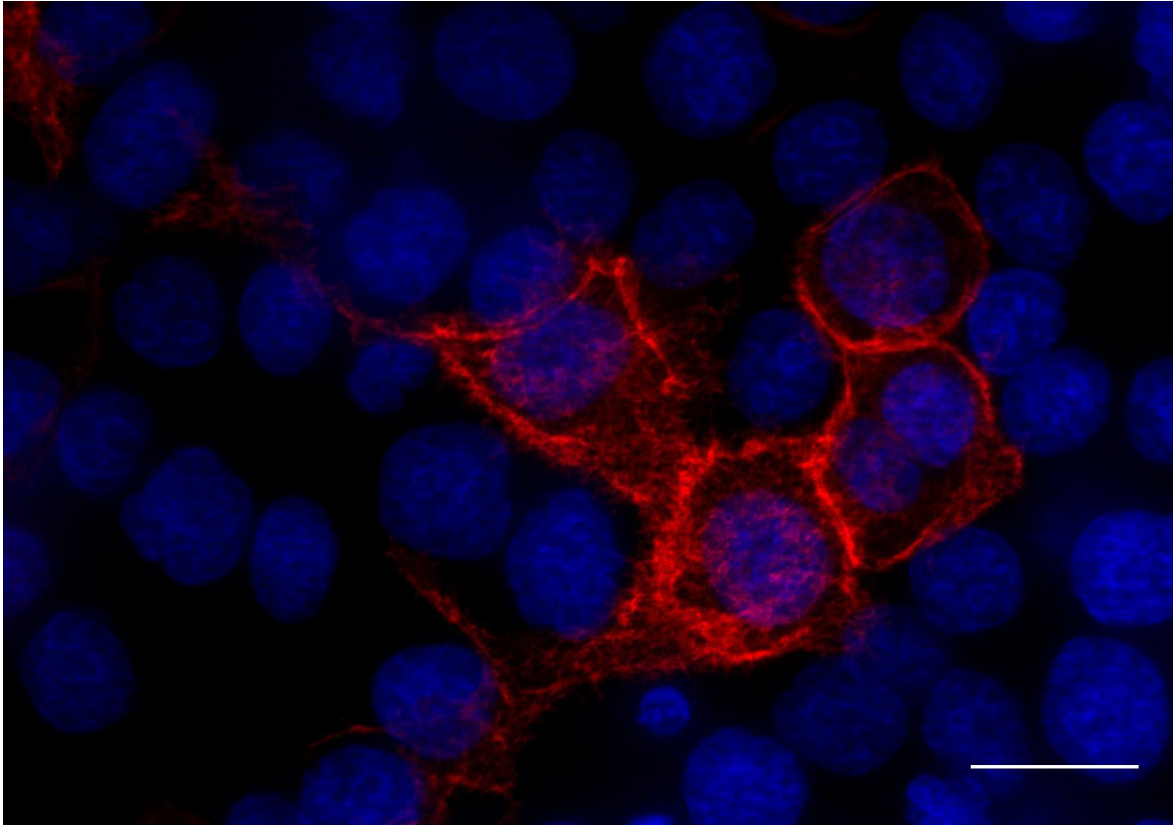

**Tumor 8. Mutation p.(Arg67\_Leu78dup)**

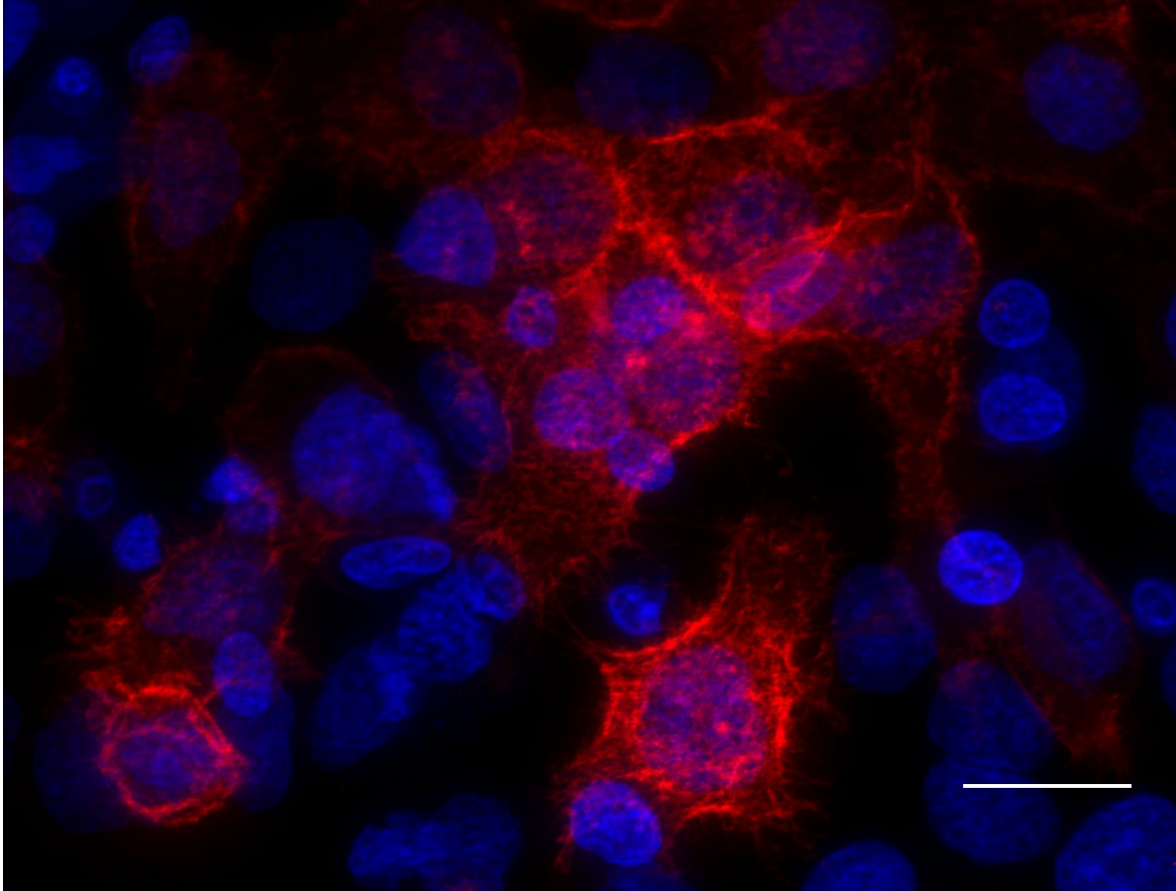

**Tumor 11. Mutation p.(Glu66\_Leu78dup)**

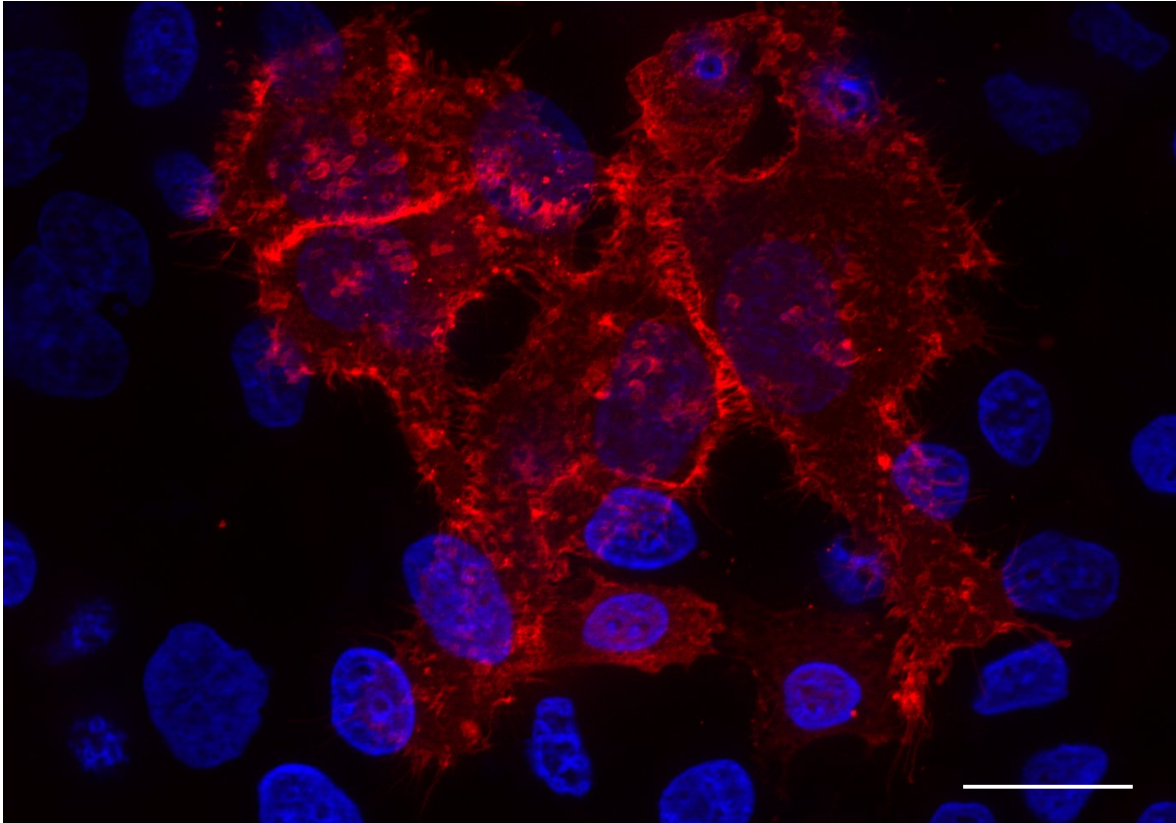



**Tumor 12. Mutation** p.(Gln61\_Arg76dup)

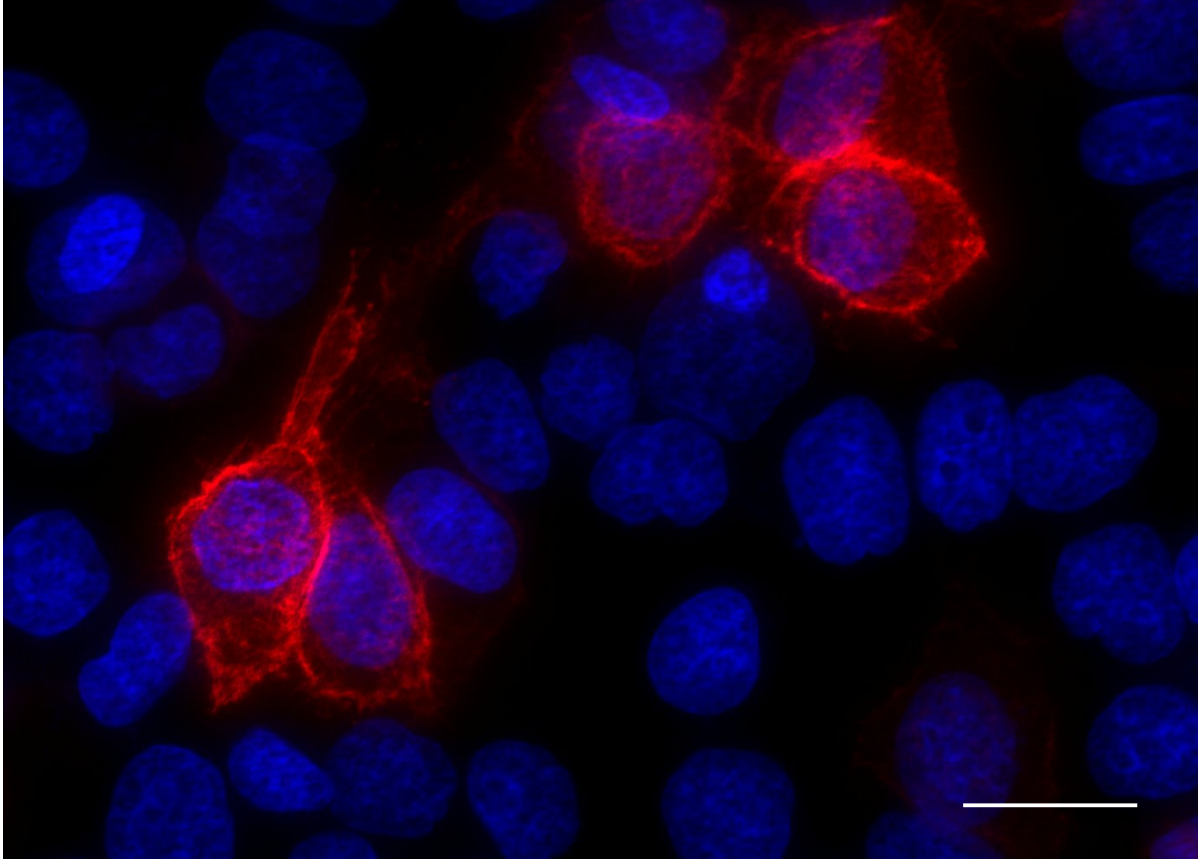

**Tumor 16. Mutation** p.(Cys77\_Leu78insGlnArgProArgProAsnThrPheIleIleArgCys)

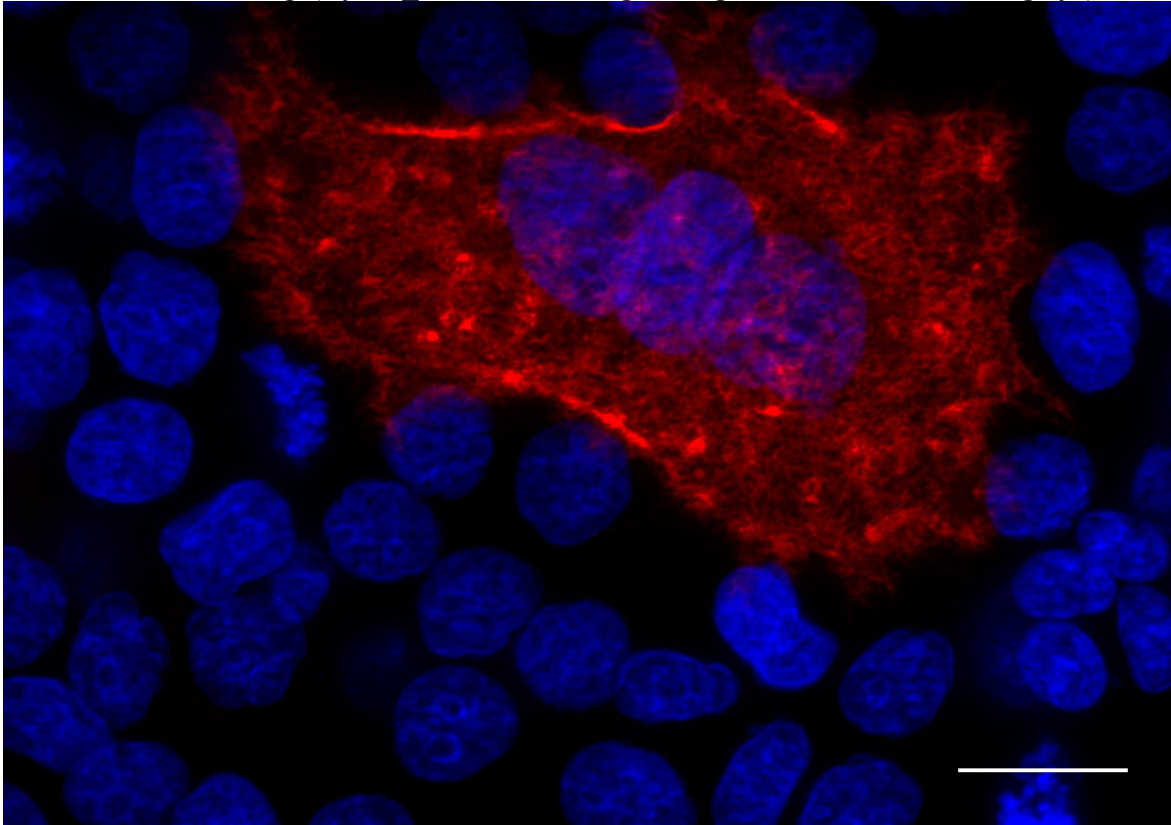

## Point mutation analysis of AKT1

**Table S1 : Summary of the point mutation analysis**

| Name (protein)   | Name (nucleic acid) | Substitution       | Affected tumor | Affected exon | Homozygous (a/a)<br>Heterozygous (a/b) | Absence in somatic tissue |
|------------------|---------------------|--------------------|----------------|---------------|----------------------------------------|---------------------------|
| p.D3Y            | c.7g>T              | gac>Tac            | 5, 8           | 1             | a/b                                    | NA                        |
| p.K14I<br>p.K14N | c.40a>T<br>c.41a>T  | aaa>aTa<br>aaa>aaT | 11             | 1             | a/b                                    | NA                        |
| p.T21I           | c.62c>T             | acc>aTc            | 7              | 2             | a/a                                    | NA                        |
| p.P24L           | c.71c>T             | cca>cTa            | 4              | 2             | a/b                                    | Yes                       |
| p.G37D           | c.110g>A            | ggc>gAc            | 5              | 2             | a/b                                    | NA                        |
| p.Q79K           | c.235c>A            | cag>Aag            | 2              | 3             | a/b                                    | Yes                       |
| p.W80R           | c.238t>A            | tgg>Agg            | 2              | 3             | a/b                                    | Yes                       |
| p.E91K           | c.271g>A            | gag>Aag            | 3              | 3             | a/a                                    | NA                        |
| p.N199I          | c.537a>T            | aac>aTc            | 13             | 6             | a/b                                    | NA                        |
| p.G232W          | c.695g>T            | ggg>Tgg            | 4              | 7             | a/b                                    | NA                        |
| p.A250F          | c.749c>T            | gcc>gTc            | 12             | 8             | a/b                                    | NA                        |
| p.D274H          | c.820g>C            | gac>Cac            | 4, 9           | 8             | a/b                                    | Yes (T4)                  |
| p.G345S          | c.1033g>A           | ggt>Agt            | 12             | 10            | a/b                                    | NA                        |
| p.P348S          | c.1042c>T           | ccc>Tcc            | 7              | 10            | a/a                                    | NA                        |
| p.L357F          | c.1069c>T           | ctt>Ttt            | 9              | 10            | a/b                                    | NA                        |
| p.S378F          | c.1133c>T           | tcc>tTc            | 4              | 10            | a/b                                    | Yes                       |
| p.M458I          | c.1374g>A           | atg>atA            | 3              | 13            | a/a                                    | NA                        |
| p.C460S          | c.1378t>A           | tgt>Agt            | 8              | 13            | a/b                                    | Yes                       |
| p.R465C          | c.1393c>T           | cgc>Tgc            | 5              | 13            | a/b                                    | NA                        |

NA : not available
